# Supplementary material for: Sprayed copper peroxide nanodots for accelerating wound healing in a multidrug-resistant bacteria infected diabetic ulcer
Source: Royal Society of Chemistry journal article supplement (doi:10.1039/d1nr04687j), 2021-01-01
Supplement: d1nr04687j2.pdf [file d1nr04687j2.pdf]

Electronic Supplementary Material (ESI) for Nanoscale.

This journal is © The Royal Society of Chemistry 2021

**Electronic Supplementary Information**

**Sprayed copper peroxide nanodots for accelerating wound healing in  
a multidrug-resistant bacteria infected diabetic ulcer**

Ran Zhang<sup>a</sup>, Guhua Jiang<sup>a</sup>, Qianqian Gao<sup>b</sup>, Xiaona Wang<sup>c</sup>, Yilin Wang<sup>a</sup>, Xin Xu<sup>a</sup>,  
Wenjing Yan<sup>a</sup>, Haijun Shen<sup>\*a</sup>

- a. Department of Preventive Medicine and Public Health Laboratory Science,  
School of Medicine, Jiangsu University, Zhenjiang 212013, China
- b. Department of Clinical Laboratory, Affiliated Kunshan Hospital of Jiangsu  
University, Kunshan 215300, China
- c. Department of Internal Medicine of Jiangsu University Hospital Workers, The  
Affiliated Hospital of Jiangsu University, Zhenjiang 212013, China

E-mail: shenhj@ujs.edu.cn

\* To whom correspondence should be addressed

**Supplementary information 1: TEM images of CuO<sub>2</sub> nanodots**

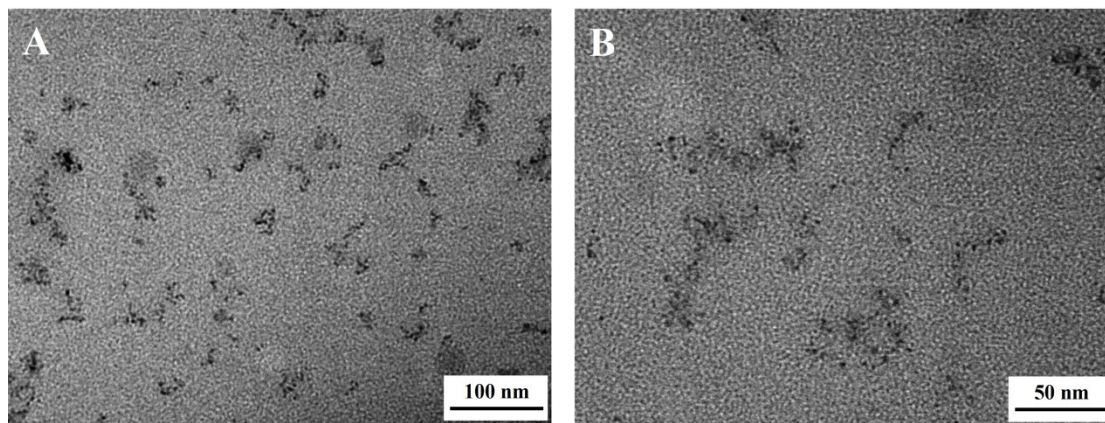

Figure S1. TEM images of CuO<sub>2</sub> nanodots at different magnifications.

## Supplementary information 2: The X-ray photoelectron spectroscopy analysis

In the XPS spectra, two O 1s peaks at 531.3 and 532.5 eV were assigned to C=O and O–O, respectively, indicating the presence of PVP and peroxy groups. The Cu 2p spectrum displayed two main peaks at 933.7 and 953.5 eV accompanied by two satellite peaks at 942.1 and 961.9 eV, indicating the valence state of Cu in CuO<sub>2</sub> nanodots was +2. An obvious N 1s peak was observed in CuO<sub>2</sub> nanodots, demonstrating the existence of PVP coating.

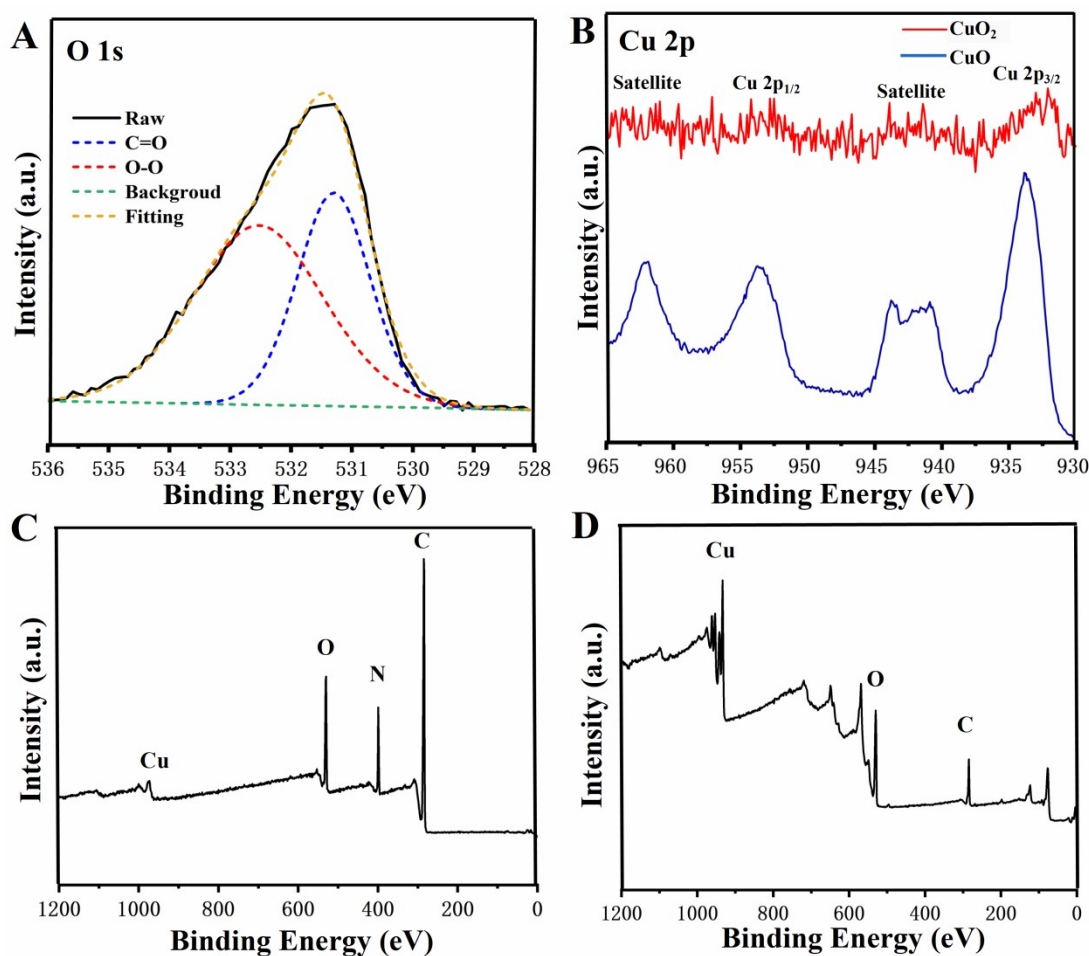

Figure S2. (A) High resolution O 1s, (B) Cu 2p, and (C) survey XPS spectra of CuO<sub>2</sub> nanodots. (D) Survey XPS spectra of CuO<sub>2</sub> synthesized in the absence of PVP.

### Supplementary information 3: Measurement of H<sub>2</sub>O<sub>2</sub> generation.

The generated H<sub>2</sub>O<sub>2</sub> was determined by KMnO<sub>4</sub> titration. In a typical process, 2.5 mg of the CuO<sub>2</sub> nanodots was dispersed in 5 mL phosphate buffer solution (PBS) with different pH values (pH 5.5 and 7.4) and incubated at 37 °C under gently shaking. At indicated time points, the suspension was separated by ultrafiltration and 3 mL filtrate was withdrawn. The release buffer was then supplemented with 3 mL fresh PBS buffer and the CuO<sub>2</sub> nanodots were re-dispersed. The collected filtrate was used for further titration analysis. After adding 0.5 mL of sulfuric acid (0.3 M) solution, the filtrate was titrated with 1 mM KMnO<sub>4</sub>. A pink color was observed at the end-point of titration.

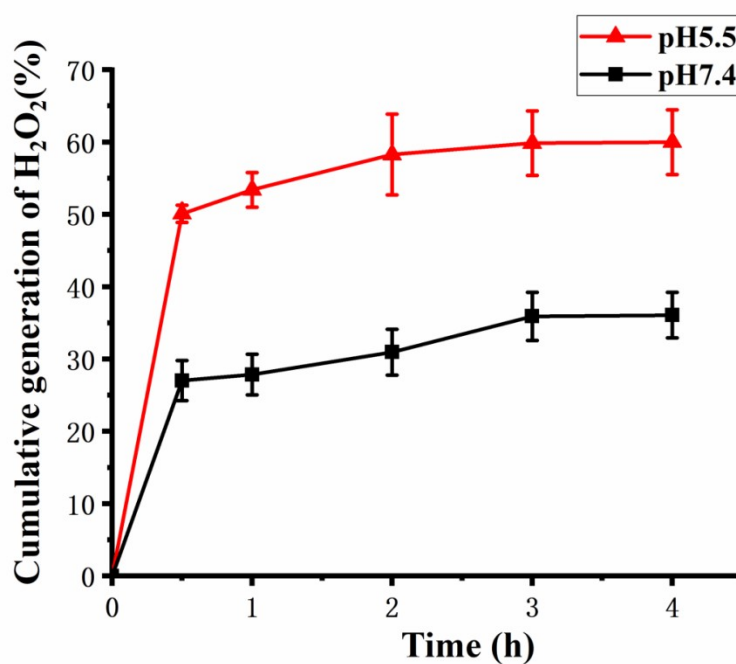

Figure S3. Cumulative generation of H<sub>2</sub>O<sub>2</sub> from CuO<sub>2</sub> nanodots in different pH conditions, showing their acid-induced dissociation.

#### Supplementary information 4: Measurement of pH values during bacterial growth

*E. coli*, *S. aureus*, MRSA and *P. aeruginosa* were incubated in LB agar plates overnight at 37 °C. A single colony was then picked up from agar plate and cultured in LB medium (6 mL) at 37 °C, respectively. At different time intervals (0, 6, 12 and 24 h), the pH values of LB medium with culturing bacteria were detected with pH meter (Sartorius PB-10). The bare LB medium was used as control.

As shown in Figure S4, the initial pH values of all groups were approximately 7.4. When extending culture time to 6 h, the pH values of bacterial suspensions with *E. coli*, *S. aureus*, MRSA and *P. aeruginosa* obviously decreased to around 6.4, 6.4, 6.3 and 6.9, respectively. However, the pH value of bare LB medium remained unchanged (7.38). Prolonging to 24 h, the pH values continued to decrease slightly. This result indicated that bacteria proliferation would generate a weak acidic microenvironment. It should be pointed out that the pH change of *P. aeruginosa* was not as remarkable as the other three bacteria strains, probably because of the difference in metabolism, such as the ability of organic acid generation utilizing carbohydrates.

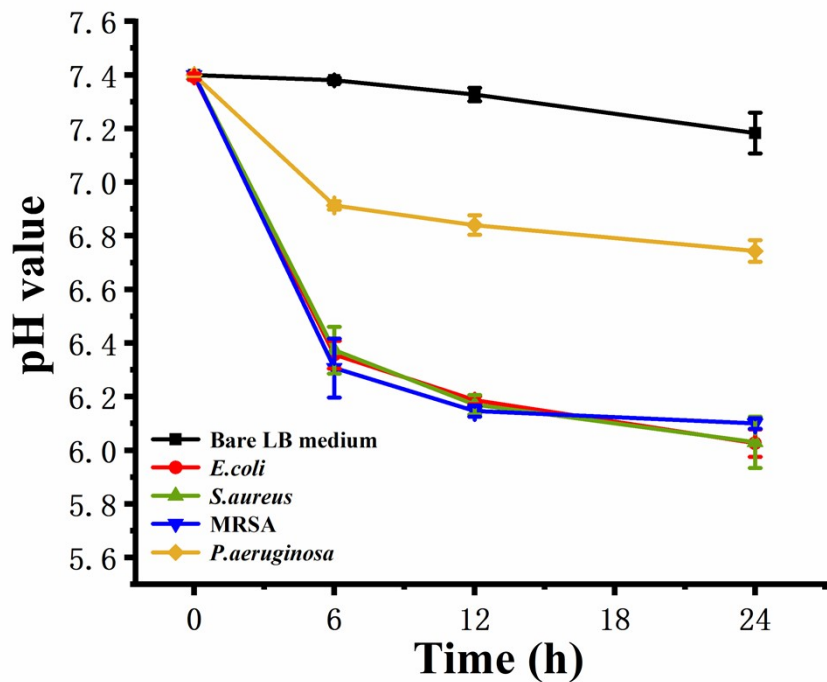

Figure S4. The pH changes of LB medium with culturing *E. coli*, *S. aureus*, MRSA and *P. aeruginosa* within 24 h.

**Supplementary information 5:** Blood glucose levels of diabetic mice in each group

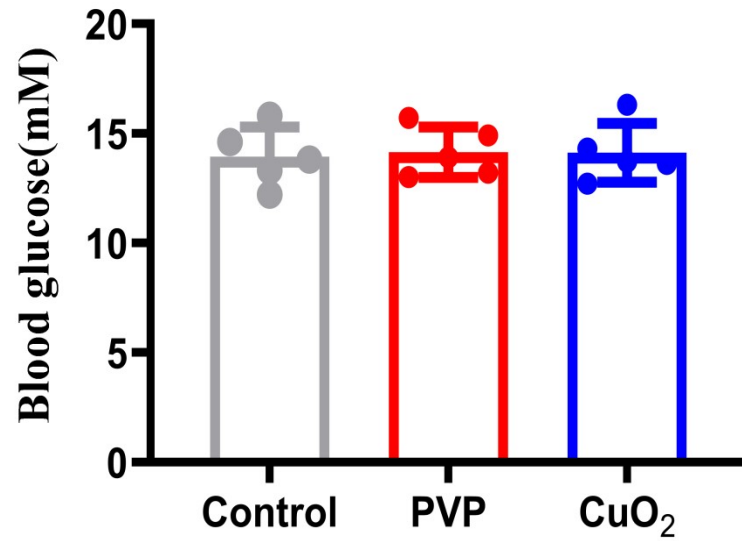

Figure S5. The initial blood glucose levels of STZ-induced diabetic mice for different wound healing treatment.
