# Supplementary material for: Sprayed copper peroxide nanodots for accelerating wound healing in a multidrug-resistant bacteria infected diabetic ulcer
Source: Royal Society of Chemistry journal article supplement (doi:10.1039/d1nr04687j), 2021-01-01
Supplement: d1nr04687j8.pdf [file d1nr04687j8.pdf]

[The rest of the page is blank or contains extremely faint, illegible text.]
