# Supplementary figures and images for: Sprayed copper peroxide nanodots for accelerating wound healing in a multidrug-resistant bacteria infected diabetic ulcer
Source: Royal Society of Chemistry journal article supplement (doi:10.1039/d1nr04687j), 2021-01-01

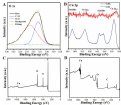

Supplement: d1nr04687j5.pdf [file d1nr04687j5.pdf]

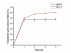

Supplement: d1nr04687j6.pdf [file d1nr04687j6.pdf]

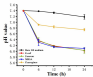

Supplement: d1nr04687j7.pdf [file d1nr04687j7.pdf]
